# Supplementary material for: Integrated Molecular Characterization of Patient-Derived Models Reveals Therapeutic Strategies for Treating CIC-DUX4 Sarcoma
Source: PubMed Central journal article supplement (PMC9359717; doi:10.1158/0008-5472.can-21-1222), 2021-12-13
Supplement: can-21-1222_supplementary_methods_and_figures_supp1-13.pdf [file can-21-1222_supplementary_methods_and_figures_supp1-13.pdf]

1 **Supplementary Data**

2 **Integrated molecular characterization of patient-derived models reveals**  
3 **therapeutic strategies for treating CIC-DUX4 sarcoma**

4  
5 Marianna Carrabotta, Maria Antonella Laginestra, Giorgio Durante, Caterina Mancarella, Lorena  
6 Landuzzi, Alessandro Parra, Francesca Ruzzi, Lisa Toracchio, Alessandra De Feo, Veronica Giusti,  
7 Michela Pasello, Alberto Righi, Pier-Luigi Lollini, Emanuela Palmerini, Davide Maria Donati, Maria  
8 Cristina Manara\* and Katia Scotlandi\*.

9 \*Corresponding authors. Email: [mariacristina.manara@ior.it](mailto:mariacristina.manara@ior.it); [katia.scotlandi@ior.it](mailto:katia.scotlandi@ior.it)

|    |                                                                                                           |
|----|-----------------------------------------------------------------------------------------------------------|
| 10 | <b>1. Supplementary Materials and Methods</b>                                                             |
| 11 |                                                                                                           |
| 12 | <b>2. Supplementary Fig. S1</b>                                                                           |
| 13 | Unsupervised and supervised hierarchical clustering (HC)                                                  |
| 14 |                                                                                                           |
| 15 | <b>3. Supplementary Fig. S2</b>                                                                           |
| 16 | Gene Set Enrichment Analysis                                                                              |
| 17 |                                                                                                           |
| 18 | <b>4. Supplementary Fig. S3-S4</b>                                                                        |
| 19 | Unsupervised hierarchical clustering: 3,179 or 537 differentially expressed genes between CDS and         |
| 20 | EWS patients were applied to an <i>in-silico</i> dataset of other human fusion-driven sarcomas and normal |
| 21 | mesenchymal stem cells                                                                                    |
| 22 |                                                                                                           |
| 23 | <b>5. Supplementary Fig. S5</b>                                                                           |
| 24 | Unsupervised hierarchical clustering: 71 differentially expressed genes between CDS and EWS               |
| 25 | patients were applied to an <i>in-silico</i> dataset of other human fusion-driven sarcomas and normal     |
| 26 | mesenchymal stem cells                                                                                    |
| 27 |                                                                                                           |
| 28 | <b>6. Supplementary Fig. S6</b>                                                                           |
| 29 | Coefficient of Variation compute on 3,179 genes in the two groups (CDS and EWS)                           |
| 30 |                                                                                                           |
| 31 | <b>7. Supplementary Fig. S7</b>                                                                           |
| 32 | MetaCore analysis                                                                                         |
| 33 |                                                                                                           |
| 34 | <b>8. Supplementary Fig. S8</b>                                                                           |
| 35 | Immunostaining of CDS human tumor samples and corresponding PDXs                                          |
| 36 |                                                                                                           |
| 37 | <b>9. Supplementary Fig. S9</b>                                                                           |
| 38 | Evidence of CIC-DUX4 fusion transcripts in CDS patients, PDXs and PDX-derived cell lines                  |
| 39 |                                                                                                           |
| 40 | <b>10. Supplementary Fig. S10</b>                                                                         |
| 41 | RNA interference silencing of HMGA2 in PDX-CDS#3-C cells                                                  |
| 42 |                                                                                                           |
| 43 | <b>11. Supplementary Fig. S11</b>                                                                         |
| 44 | Akt signaling mediators in PDX-CDS-C#4 cells treated or not with the anti-IGF1R hAb AVE 1642              |
| 45 |                                                                                                           |
| 46 | <b>12. Supplementary Fig. S12</b>                                                                         |
| 47 | Isobologram schematic representation of the effects of combined NVP-BEZ235 and trabectedin                |
| 48 | treatment in PDX-CDS#4-C and PDX-CDS#3-C cells                                                            |
| 49 |                                                                                                           |
| 50 | <b>13. Supplementary Fig. S13</b>                                                                         |
| 51 | Immunohistochemical evaluation of p-Akt, p-mTOR, and p-S6 in xenografts after s.c. injection of           |
| 52 | PDX-CDS#4 cells treated with trabectedin, NVP-BEZ235 or the combination of the two drugs                  |

## 53 **Supplementary Materials and Methods**

### 54 **RNA-seq library preparation**

55 All patients had a diagnosis of CDS or EWS made on representative specimens based on histologic,  
56 cytologic, and immunohistochemistry (IHC) features as well as the molecular presence of the  
57 chimeric product.

58

### 59 **RNA-seq data analysis**

60 FASTQ files were quality controlled using FastQC Version 0.11.9  
61 (<http://www.bioinformatics.babraham.ac.uk/projects/fastqc/>; RRID:SCR\_014583) and analyzed  
62 using RNA Express BaseSpace App (Illumina; RRID:SCR\_011881). Paired end reads were aligned  
63 to the human reference sequence GRCh37 by STAR alignment (RRID:SCR\_004463) (1). Then, HT-  
64 Seq Counts (RRID:SCR\_011867) and Deseq2 (RRID:SCR\_015687) were used to assign aligned  
65 reads to genes and to perform differential gene expression (computed on raw counts) (2,3).

66 Raw counts were normalized according to the library size to obtain transcripts per million (TPM),  
67 and 14,334 genes were used to generate unsupervised hierarchical clustering (HC) and 3D principal  
68 component analysis (PCA). Unsupervised HC was generated using the Hclust R function  
69 (RRID:SCR\_009154) based on the Ward.D2 method and Euclidean distance as a measure of  
70 similarity (R package stats v3.6.2) (RRID: SCR\_000432). PCA was conducted using the prcomp R  
71 function (4) and visualized by the 3D visualization device system RGL (R package version 0.100.54;  
72 <https://CRAN.R-project.org/package=rgl>).

73 Starting from the Deseq2 output, we performed several steps of selection and filtration of data; in  
74 particular, the output was first selected for the status (column of Deseq2 output) of the genes, which  
75 included outliers (genes in which the result was strongly affected by a single outlier replicate), low  
76 genes (genes with a low average expression across samples with a mean count across all samples less  
77 than 10), and OK status. Therefore, only the genes with an output corresponding to OK status

78 were selected and the whole list of these genes was filtered for an Benjamini-Hochberg (BH) adjusted  
79 p-value <0.05.

80 Then, from this gene list, we analyzed the single gene level counts in the two groups (EWS and CDS)  
81 by selecting genes with a mean raw count >5 for each group. In addition, we specifically analyzed  
82 the selected genes in the context of their expression. We performed a coefficient of variation analysis  
83 (CV=Standard Deviation/Mean) for the selected genes in both the two sample groups (CDS and  
84 EWS) and considered a CV threshold  $\leq 0.25$  (CV<0.1 very good; 0.1-0.2 good; 0.2-0.3 acceptable)  
85 (5). This analysis was computed on regularized logarithm transformation (rlog) of raw count (3).

86 The selected signatures were used for Spearman's correlation analysis among CDS patients, PDXs  
87 and corresponding PDX-derived cell lines and we calculated the confidence interval (CI<sub>95%</sub>) that  
88 provides a measure of the overlapping among the correlation coefficients (6). Furthermore, we  
89 applied statistical significance tests to assess the comparison of two correlation coefficients either in  
90 intra- and inter- CDS/PDX/PDX derived cell line groups (7,8).

91 Heatmaps and correlograms were generated using the ComplexHeatmap (RRID:SCR\_017270) and  
92 CorrPlot R packages, respectively (9).

93 Briefly, for heatmap generation we considered rlog (regularized logarithm) of raw counts, and then  
94 we applied the Z-score scaling method for visualization of differentially expressed genes between  
95 CDS and EWS patients. All analyses were performed using R version 4.0.3 (Bioconductor,  
96 <http://www.bioconductor.org/>; RRID:SCR\_006442).

97 Functional analysis was performed using gene set enrichment analysis (GSEA; RRID:SCR\_003199).  
98 The Molecular Signature Database (MsigDB) c2.all.v7.0.symbols.gmt signature  
99 (RRID:SCR\_016863) was used and gene sets with between 15 and 200 members were considered.

100 GSEA was performed using GSEA-pre-ranked module against our ranked list of 3,179 genes, to  
101 determine whether a priori defined sets of genes show significant enrichment at either end of the  
102 ranking (top or bottom ranks). In particular, we performed the following steps: 1) we computed

103 differential expression analysis using DeSeq2; and 2) we ranked our gene list (from most upregulated  
104 to most downregulated genes), choosing as ranking metric the  $\log_2FC$  (fold change) (10,11) .  
105 The most relevant gene sets were selected considering a normalized enrichment score (NES)  $\geq 2.5$   
106 and a false discovery rate (FDR)  $\leq 0.001$ . After selecting the most relevant gene sets we performed  
107 leading-edge analysis to investigate key genes related to the transcriptomic changes of CDS samples.  
108 In particular, the leading edge analysis is determined from the enrichment score (ES), which is defined  
109 as the maximum deviation from zero (10) . First, to start with the leading edge analysis, we selected  
110 the gene sets that were to be compared from, by ranking the gene sets based on the  $FDR \leq 0.001$ . and  
111  $NES \geq 2.5$  as cutoff (12) . The web-based software MetaCore (GeneGo, Thomson Reuters,  
112 RRID:SCR\_008125) was used to put the genes resulting from leading edge analysis in the context of  
113 a protein-protein interaction network. Starting from the list of 71 core enriched genes, we used the  
114 “direct interaction” algorithm to evaluate the protein-protein interaction of these 71 genes to build a  
115 network. Then, we used only the “objects” (genes) in the original list; no other “objects” from the  
116 MetaCore database were added. Only the “objects” in the list that can directly interact with each other  
117 resulted in a “link” between two network objects.

118 To validate the gene signatures characteristic of CDS, we considered a published microarray-based  
119 gene expression data set of 14 CDS (GSE60740), 7 EWSR1-NFATc2 (GSE60740), 27 EWS (E-  
120 MEXP-1142), 8 monophasic synovial sarcomas (MSS, E-MEXP-353), 6 myxoid liposarcomas  
121 (MLS, E-MEXP-353), 4 rhabdomyosarcoma (ARMS, E-MEXP-353) patient-derived tumors and 17  
122 normal mesenchymal stem cells (MSC)(GSE7888).

123 Raw CEL file data were normalized using robust multi-array average normalization (RMA) and  $\log_2$   
124 transformed. To reduce the variability across different data sets, we performed batch effect correction  
125 using the `removeBatchEffect` function from the `limma` R package (11). Unsupervised HC was adopted  
126 to test the gene signature, and Z-scores of  $\log_2$  transformed expression values were displayed by  
127 `ComplexHeatmap` R package (RRID:SCR\_017270) (9).

128 **Establishment of CDS PDXs and PDX-derived cell lines**

129 To generate PDXs, a fresh tumor specimen approximately 4 mm<sup>3</sup> in volume was implanted  
130 subcutaneously (s.c.) at the level of interscapular brown fat into 5–11-week-old immunodeficient  
131 NOD SCID gamma (NSG) mice (Charles River; RRID:IMSR\_ARC:NSG) within an average of 1–2  
132 hours following resection from the patient. Tumor growth was checked at least twice weekly until it  
133 reached the endpoint volume of 2.5 cm<sup>3</sup>, at which point the mouse was sacrificed by inhalation of the  
134 CO<sub>2</sub> and cervical dislocation. Accurate necropsy was performed and lung metastases were outlined  
135 by the intratracheal injection of black India ink. The lungs were fixed in Fekete's solution and  
136 metastases were counted under a stereoscope. The tumor was resected and tumor fragments were  
137 implanted in NSG mice to produce subsequent PDX passages, as previously described by Nanni *et*  
138 *al.* (13). The remaining fragments were finely minced with scissors and either used for  
139 histopathological and molecular analyses or seeded in flasks with complete growth medium to obtain  
140 a PDX-derived cell line.

141 All PDX-derived cell lines were authenticated by DNA fingerprinting (AMEL, D3S1358, TH01,  
142 D21S11, D18S51, D10S1248, D1S1656, D2S1338, D16S539, D22S1045, VWA, D8S1179, FGA,  
143 D2S441, D12S391, D19S433 and SE33; last control July 2020; POWERPLEX ESX 17 Fast System,  
144 Promega) compared to the profile of the original surgical specimen and of the PDX when appropriate.  
145 Cell lines were immediately expanded to generate liquid nitrogen stocks and were never passaged for  
146 more than one month after thawing to avoid genetic or phenotypic modifications due to culture  
147 conditions. Cells were maintained in Iscove's modified Dulbecco's medium (IMDM; ECB2072L,  
148 Euroclone) supplemented with 10% heat-inactivated FBS (ECS0180L, EuroClone), 100 U/mL  
149 penicillin and 100 mg/mL streptomycin (P0781-100ML, Merck) in a 37°C humidified environment  
150 at 5% CO<sub>2</sub>. All cell lines were tested for mycoplasma-contamination by using MycoAlert  
151 Mycoplasma detection kit (LT07-418, Lonza) every 3 months.

152 **Assessment of CIC-DUX4 rearrangements and contamination of murine fibroblasts**

153 For the identification of CIC-DUX4 rearrangements, 500 ng of total RNA was reverse transcribed  
154 and amplified by PCR (primer set: Fw: 5'-GAGGACGTGCTTGGGGAGCTAGAGT-3', 2R2 Rv:  
155 5'-CGCTGTGTGGAGTCTCTCACCG-3', ex2 Rv: 5'- CCGCGGAGTGGAGTCTCTCACCG-3').  
156 A negative control and a 100 bp DNA ladder (G210A, Promega) were included in each RT- PCR  
157 assay (Supplementary Fig. S8).

158 All cell lines were qPCR screened for the contamination of murine fibroblasts; briefly, gDNA was  
159 extracted by proteinase K digestion and silica column purification from the newly established PDX-  
160 derived cell line using PureLink Genomic DNA minikit (K1820-01, Thermo Fisher Scientific). Forty  
161 nanograms of total gDNA were screened for the amplification of two murine genes and a human  
162 (human *ACTB* and murine *Gapdh* and *Actb*). The quantification of the human to mouse ratio was  
163 achieved through the interpolation to a relative standard curve for each gene to verify the exclusive  
164 presence of human cells.

165 **qRT-PCR analysis**

166 Predesigned TaqMan probes (Thermo Fisher Scientific) were used to determine the expression levels  
168 of *HMGA1* (Hs00431242\_m1), *HMGA2* (Hs04397751\_m1), *IGF2BP2* (Hs00538956\_m1), and  
169 *IGF2BP3* (Hs00559907\_g1); a primer sets for *IGF2* (Fw: 5'-GACCGCGGCTTCTACTTCAG-3',  
170 Rv: 5'-AAGAACTTGCCCACGGGGTAT-3') were used for SYBR Green quantification and a  
171 primer pairs for the reference gene *GAPDH* were used as previously reported (14). Total RNA from  
172 primary cultures of human mesenchymal stem cells (hMSCs) obtained during surgery was used as  
173 interplate calibrator.

174 **Western blotting**

175 Harvested cells were rinsed in 1X PBS and lysed in phosphoprotein extraction buffer supplemented  
176 with protease-phosphatase cocktail inhibitor (P8340, Merck). Western blotting was executed  
177 according to standard procedures. Membranes were incubated overnight with the following primary  
178 antibodies: anti-HMGA2 (rabbit polyclonal, GTX100519, 1:4000, GeneTex, RRID:AB\_1950498);  
179 anti-IGF2BP2 (rabbit, polyclonal RN008P, dilution 1:5000, MBL International,  
180 RRID:AB\_1570641); anti-IGF2BP3 (polyclonal, rabbit, RN009P, dilution 1:5000, MBL  
181 International, RRID:AB\_1570642); anti-IGF2 (rabbit, polyclonal, ab9574, dilution 1:1000, Abcam,  
182 RRID:AB\_308725); anti-IGF1R $\beta$  (rabbit, polyclonal, sc-713, dilution 1:1000, Santa Cruz  
183 Biotechnology, RRID:AB\_671792); anti-GAPDH (14C10, rabbit, 2118, dilution 1:5000, Cell  
184 Signaling Technology, RRID:AB\_10693448); anti-phospho-AKT (Ser473) (736E11, rabbit, #3787,  
185 dilution 1:1000, Cell Signaling Technology, RRID:AB\_331170), anti-AKT (rabbit, polyclonal,  
186 #9272, dilution 1:3000, Cell Signaling Technology, RRID:AB\_329827), anti-phospho-mTOR  
187 (Ser2448) (rabbit, polyclonal, #2971S, dilution 1:1000, Cell Signaling Technology,  
188 RRID:AB\_330970), anti-mTOR (rabbit, polyclonal, #2972, dilution 1:2000, Cell Signaling  
189 Technology, RRID:AB\_330978), anti-phospho-p44/42 MAPK (Erk1/2) (Thr202/Tyr204) (rabbit,  
190 197G2, #4377, dilution 1:1000, Cell Signaling Technology, RRID:AB\_331775), anti-p44/42 MAPK  
191 (Erk1/2) (rabbit, polyclonal, #9102, dilution 1:5000, Cell Signaling Technology, RRID:AB\_330744),  
192 anti-phospho S6 ribosomal protein (Ser240/244) (rabbit, polyclonal, #2215, dilution 1:2000, Cell  
193 Signaling Technologies, RRID:AB\_331682), anti-S6 ribosomal protein (rabbit, 54D2, #2317,  
194 dilution 1:2000, Cell Signaling Technologies, RRID:AB\_2238583). Donkey Anti-Rabbit IgG, Whole  
195 Ab ECL Antibody, HRP Conjugated (NA934, dilution 1:1000-1:5000, GeHealthcare,  
196 RRID:AB\_772206) was used as secondary antibody.



197 **Preclinical *in vitro* experiments**

198 *In vitro* drug sensitivity was assessed using the TACS® MTT Cell Proliferation Assay kit  
199 (#4890/25/K, Trevigen) according to the manufacturer's instructions. Cells were plated into 96-well  
200 plates (40,000 cells/well) in standard medium and cultured for 24 hours, before they were treated with  
201 the chemicals listed in the paper for 72 hours. Where applicable, cells were also treated with dimethyl  
202 sulfoxide (DMSO, #D2650, Merck) as a control to a final concentration <0.001%, which had no effect  
203 on cell growth. For the combination treatments, cells were sequentially administered trabectedin for  
204 24 hours (dosage: 0.03 nmol/L for PDX-CDS#4-C and 0.1 nmol/L for PDX-CDS#3-C corresponding  
205 to doses that cause 20-30% growth inhibition, respectively), followed by NVP-BEZ235 (dosage:  
207 0.01-0.03-0.06-0.1-0.3-1 µmol/L) for additional 48 hours.

208 For basal gene and protein expression analysis,  $1 \times 10^6$  cells were grown in standard medium for 48  
209 hours and processed for qRT-PCR and western blotting, as described above.

210 To evaluate the molecular effects of IGF2, PDX-CDS and PDX-EWS cells were seeded ( $1 \times 10^6$  cells)  
211 in IMDM supplemented with 10% FBS. Cells were serum-starved for 24 hours in IMDM containing  
212 1% FBS before they were exposed to IGF2 (50 ng/mL, # 12526, Merck Life Science) for 24 hours.  
213 Harvested cells were used for the preparation of cell lysates for western blot.

214 To evaluate the molecular effects of trabectedin, semiconfluent cells were treated with trabectedin (3  
215 nmol/L) for 3-6 hours for qRT-PCR and for 24-48 hours for protein analysis.

216 Knockdown of CIC-DUX4 was achieved using CIC-specific siRNAs from Qiagen (SI04368469|S1 -  
217 Hs\_CIC\_8 FlexiTube siRNA SI04275656|S1 and Hs\_CIC\_6 FlexiTube siRNA). AllStars Negative  
218 Control siRNA (5 nmol/L) (Cat. No. 1027280, Qiagen) was used as a control. A combination of both  
219 siRNAs (20 nmol/L each) was transfected into PDX-CDS#4-C cells using TransIT-X2 (MIR6000,  
220 Mirus) in accordance with the manufacturers' protocol. Cells were harvested for qRT-PCR analysis  
221 72 hours after transfection. Silencing was checked by PCR (primer

222 set: Fw: 5'-GAGGACGTGCTTGGGGAGCTAGAGT-3', ex2 Rv: 5'-  
223 CCGCGGAGTGGAGTCTCTCACCG-3').

224 Transient silencing of HMGA2 was performed using short interfering RNA (siRNA) SMART POOL  
225 siGENOME\_siRNA (M-013495-02-0020, GE Healthcare Dharmacon). As control,  
226 siGENOME\_nontargeting siRNA was employed (D-001206-13-05, GE Healthcare Dharmacon).  
227 siRNAs (40nmol/L) were transfected into PDX-CDS#3-C cells using TransIT-X2 in accordance with  
228 the manufacturers' protocol. Cells were harvested for qRT-PCR and protein analysis 120 hours after  
229 transfection.

230 To evaluate the impact of trabectedin in combination with NVP-BEZ235 on the phosphorylation  
231 status of the IGF1R/AKT pathway, semiconfluent cells were treated with trabectedin (3 nmol/L) for  
232 24 hours and then with NVP-BEZ235 (dosage: 30, 100, 300 nmol/L) for an additional 24 hours.

233 To evaluate the impact of AVE 1642, semiconfluent cells were treated with AVE 1642 (1 µg/mL) for  
234 1-24 hours. Harvested cells were used for preparation of cell lysates for western blot.

### 235 **Pharmacological *in vivo* experiments**

236 The treatment groups, both after s.c. and i.v. injection of  $2 \times 10^6$  PDX-CDS#4-C cells, were as follows  
237 (5-7 mice per group): trabectedin, 0.15 mg/kg intravenously (i.v) at day 1 of treatment; NVP-BEZ235  
238 25 mg/kg per os (p.o.) dissolved in NMP 10% (1-methyl-2-pyrrolidone, 328634, Merck)/PEG300  
239 90% (202371, Merck) daily, 5 days/week, for 3 and 5 weeks, respectively; NVP-BEZ235 p.o. in  
240 combination with trabectedin i.v. following the time schedule mentioned above; the control group  
241 was not treated.

242 Tumor size was measure using calipers twice a week and tumor volumes were calculated according  
243 to the formula  $\pi[\sqrt{(a \times b)}]^3/12$ , where a=maximal tumor diameter and b=tumor diameter perpendicular  
244 to a. Mice developing s.c. tumors were sacrificed at 36 days after cell injection or for ethical reasons,  
245 when the tumors reached a volume of  $2.5 \text{ cm}^3$ .

246 Mice developing experimental metastases were sacrificed at 6 weeks from i.v. cell injection when  
247 very initial signs of metastatic growth appeared in the control group not receiving any treatment. The  
248 mice were subjected to an accurate necropsy. The lungs were perfused with black India ink;lung and  
249 liver metastases were counted using a dissection microscope, and any other metastatic lesion in other  
250 sites (mainly interscapular adipose tissue and lymph nodes) was recorded, collected and fixed in a  
251 10% buffered formalin solution (HT501128, Merck).

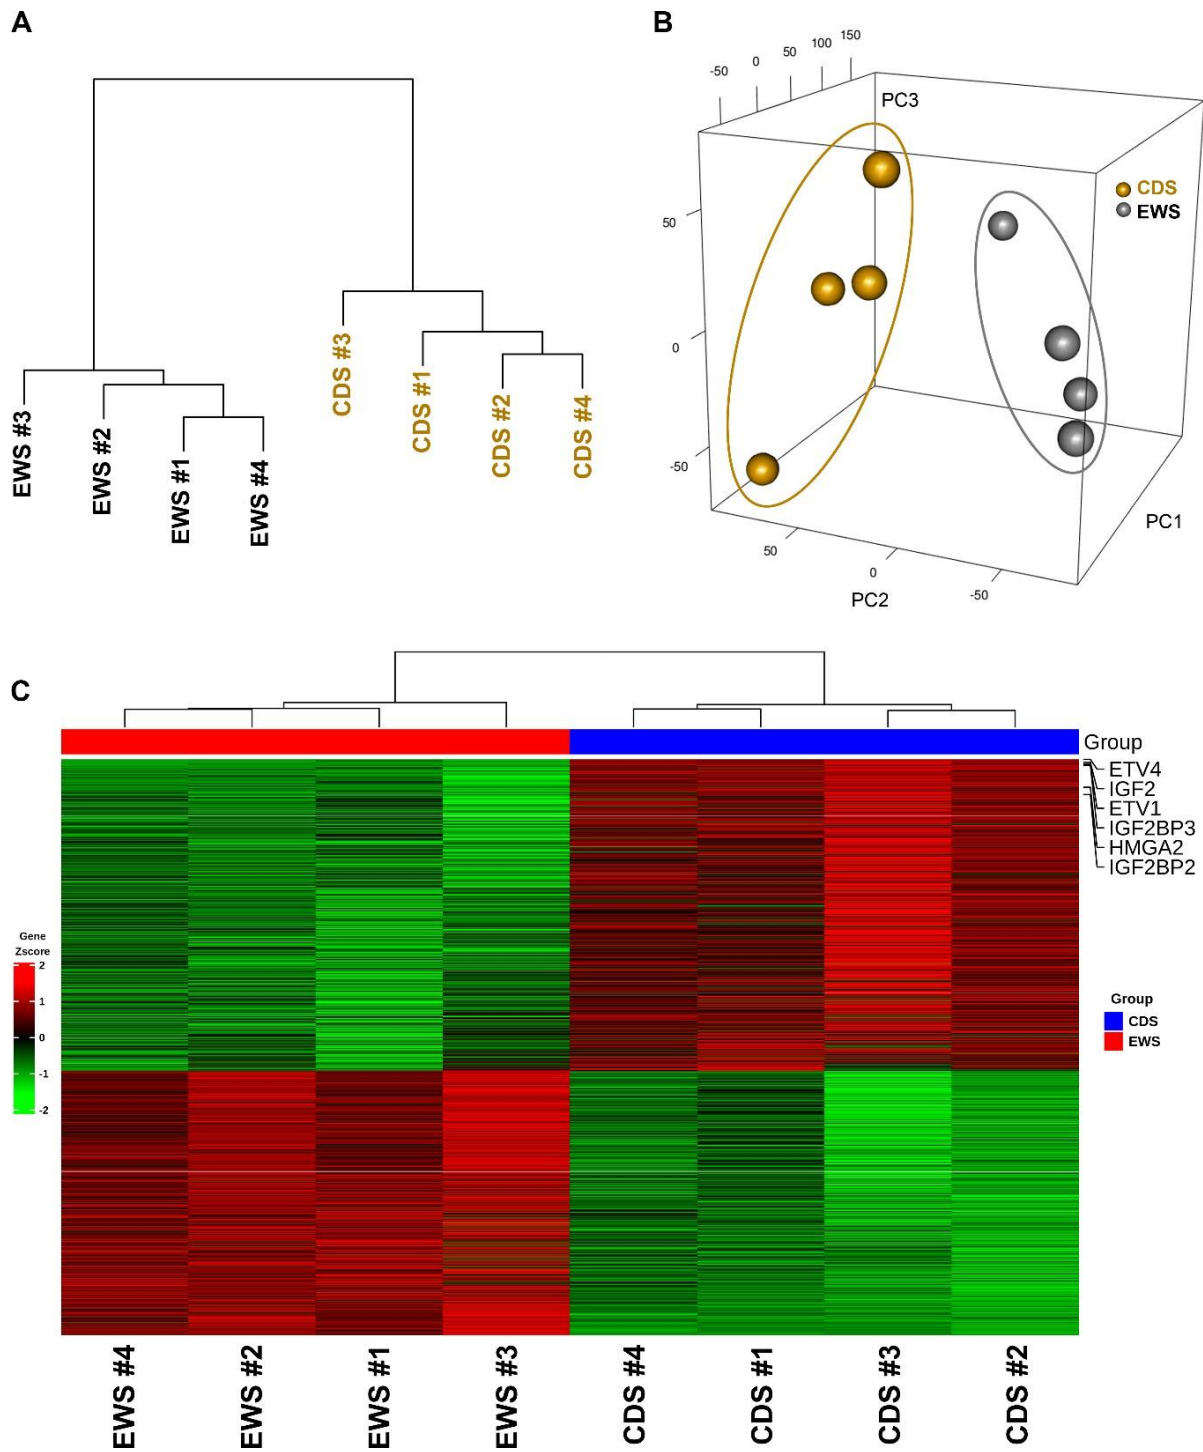

253 **Unsupervised and supervised hierarchical clustering (HC)**

254 (A) HC comparing CDS and EWS patient tumor samples. HC was generated using WARD.D2  
 255 method and Euclidean distance as a measure of similarity. (B) PCA plot shows the different  
 256 transcriptomes between the CDS and EWS groups. In particular, the percentage of variance explained  
 257 by the 3 main components was 78.8% (component 1, x-axis: 43.7%; component 2, y-axis: 25.4%;

258 component 3, z-axis: 9.7%). (C) 3,179 genes were differentially expressed between CIC-DUX4  
259 *versus* Ewing sarcoma patients. In the matrix, each row represents a gene and each column represents  
260 a sample. The color scale illustrates the relative expression level of a gene across all samples: red  
261 represents an expression level above the mean, and green represents expression lower than the mean.

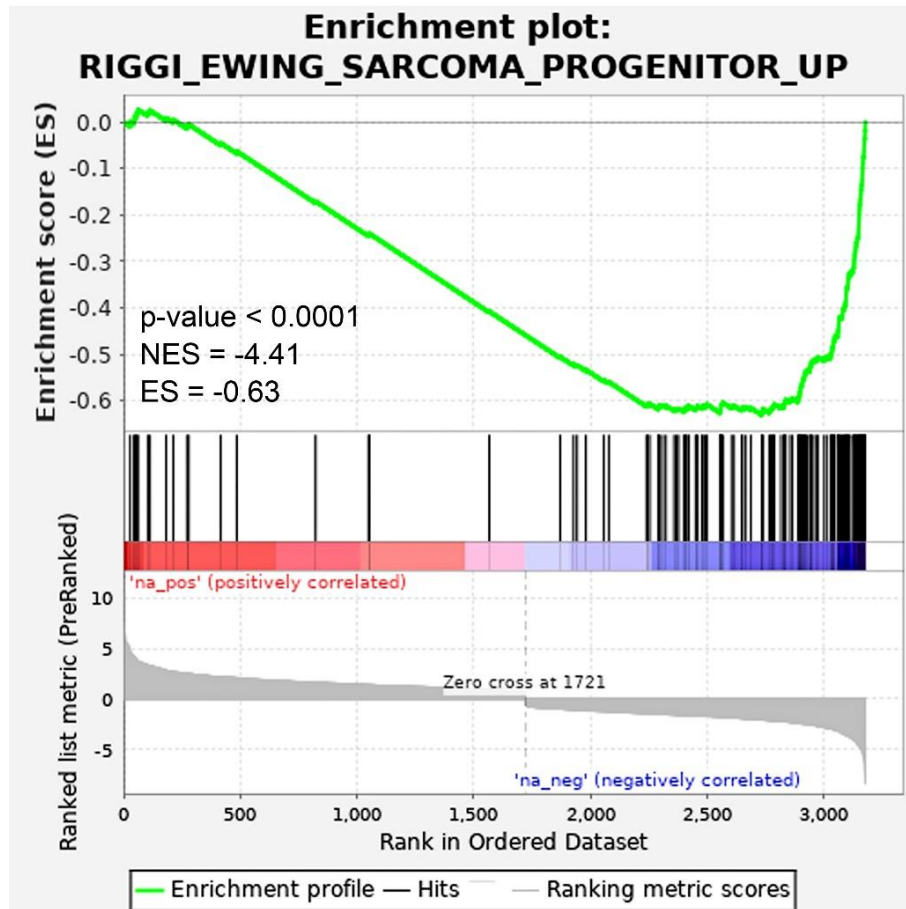

263 **Gene Set Enrichment Analysis**

264 GSEA revealed that the CIC-DUX4 transcriptional profile negatively correlated with the gene  
 265 signature upregulated in Ewing sarcoma previously reported by Riggi *et al.* (15). In the enrichment  
 266 plot, the x-axis shows the rank order of genes from the most upregulated to the most downregulated  
 267 between CIC-DUX4 and Ewing sarcoma samples. The vertical black line indicates the position of the  
 268 enriched gene (Hit) comprising the gene set. The graph on the bottom shows the ranked list metric  
 269 (signal-to-noise ratio) for each gene as a function of the rank in the ordered dataset.

270 Supplementary Fig. S3

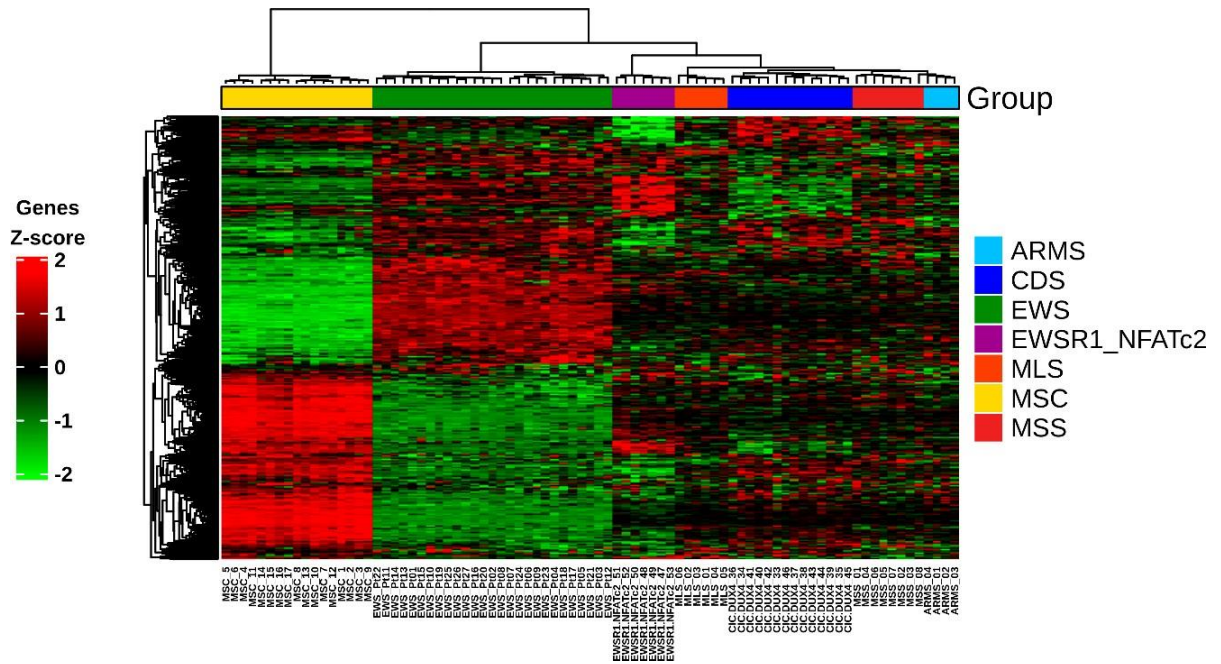

271 Supplementary Fig. S4

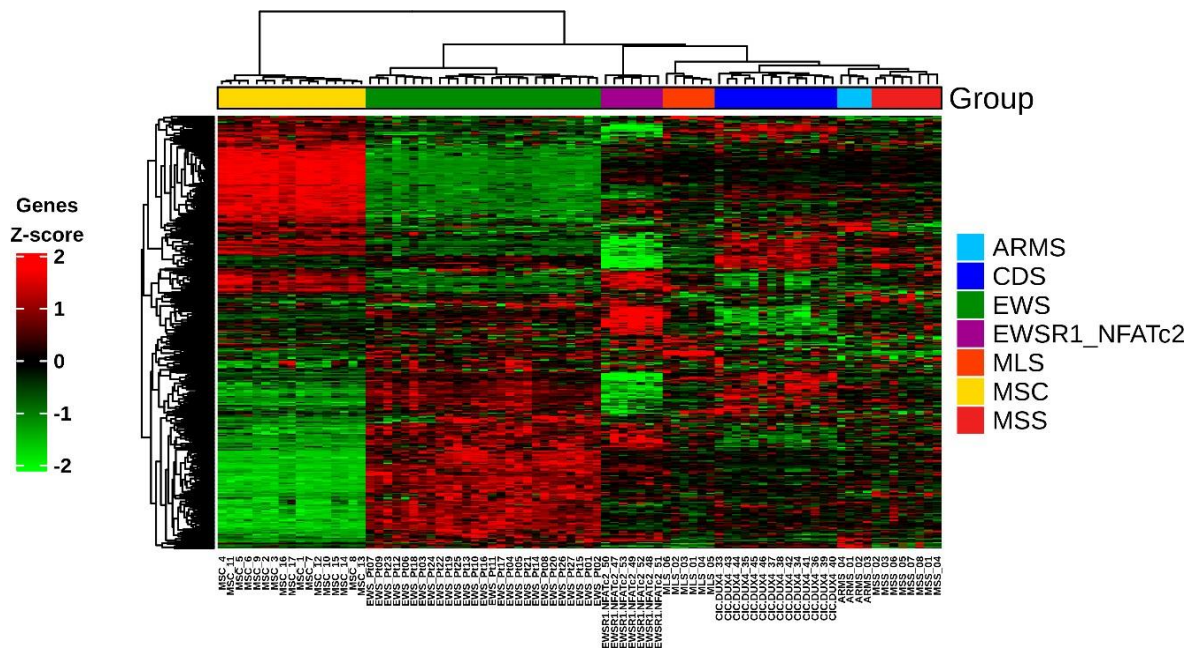

272 **Supplementary Fig. S3-S4**

273 **Unsupervised hierarchical clustering: 3,179 and 537 gene signatures differentially expressed**  
274 **between CDS and EWS patients** were applied to an *in silico* dataset of 14 CIC-DUX4 (CDS), 7  
275 EWSR1-NFATc2, 27 Ewing (EWS), 8 monophasic synovial sarcomas (MSS), 6 myxoid  
276 liposarcomas (MLS), 4 rhabdomyosarcoma (ARMS) patient-derived tumors and 17 normal  
277 mesenchymal stem cells.

278 The hierarchical clustering algorithm showed a distinct cluster of normal mesenchymal stem cells  
279 from the other sarcoma tumors, and specifically, the CDS group presented a distinct cloud with  
280 respect to the other histotypes. In the matrix, each row represents a gene and each column represents  
281 a sample. The color scale illustrates the relative expression level of a gene across all samples: red  
282 represents an expression level above the mean and green represents expression lower than the mean.



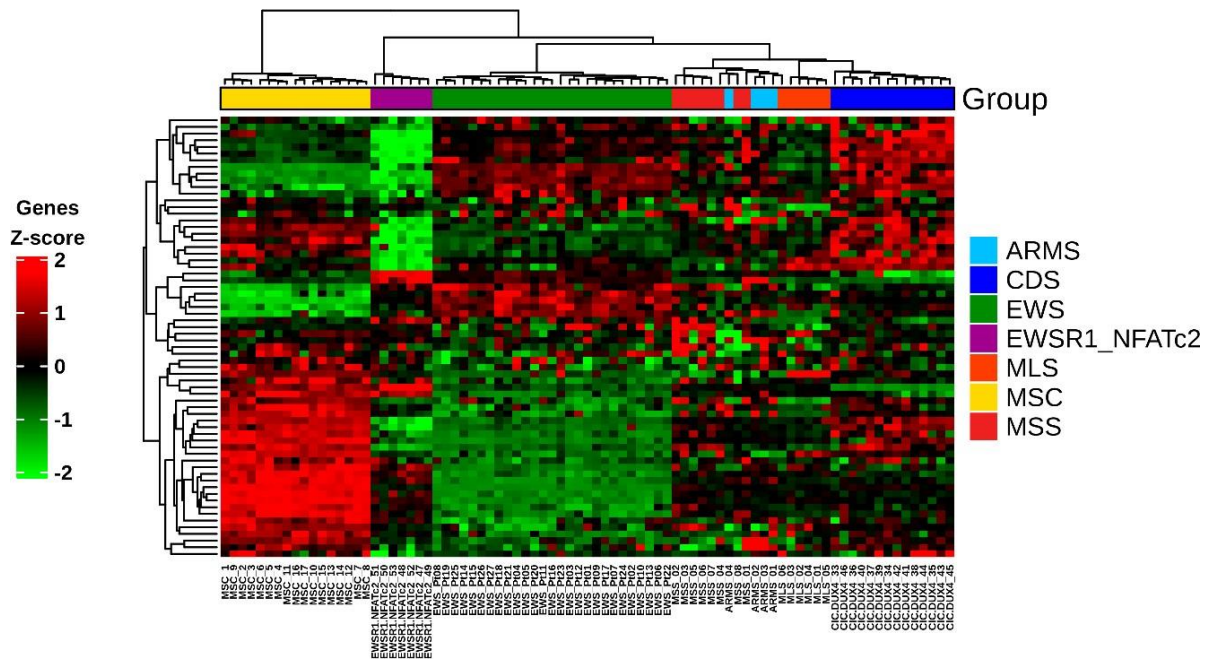

284 **Unsupervised hierarchical clustering: 71 differentially expressed genes between CDS and EWS**  
 285 **patients** were applied to an *in silico* dataset of 14 CIC-DUX4 (CDS), 7 EWSR1-NFATc2, 27 Ewing  
 286 (EWS), 8 monophasic synovial sarcomas (MSS), 6 myxoid liposarcomas (MLS), 4  
 287 rhabdomyosarcoma (ARMS) patient-derived tumors and 17 normal mesenchymal stem cells.  
 288 A hierarchical clustering algorithm showed a distinct cluster of CDS from other sarcoma tumors and  
 289 mesenchymal stem cells, when the 71 enriched gene signature was applied. In the matrix, each row  
 290 represents a gene and each column represents a sample. The color scale illustrates the relative  
 291 expression level of a gene across all samples: red represents an expression level above the mean and  
 292 green represents expression below the mean.

293 **Supplementary Fig. S6**

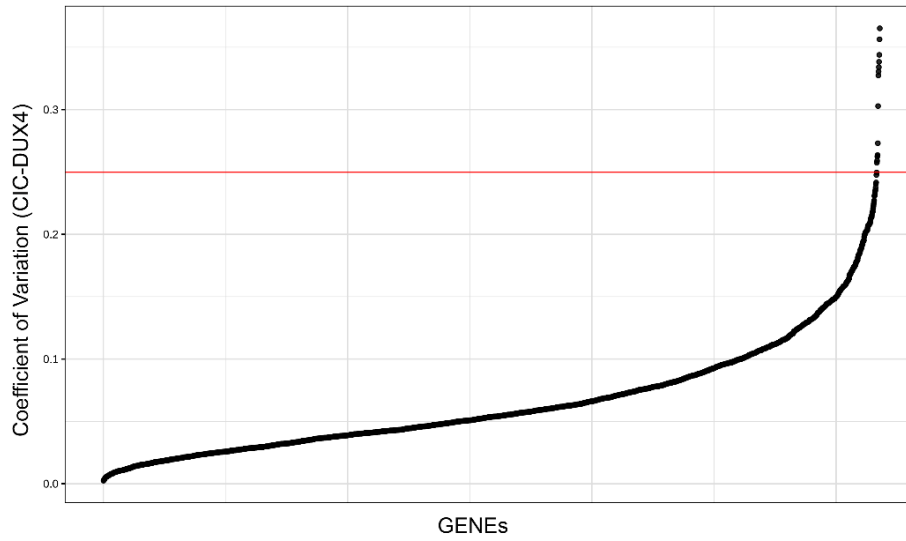

CV<0.1 very good, 0.1-0.2 good, 0.2-0.3 acceptable

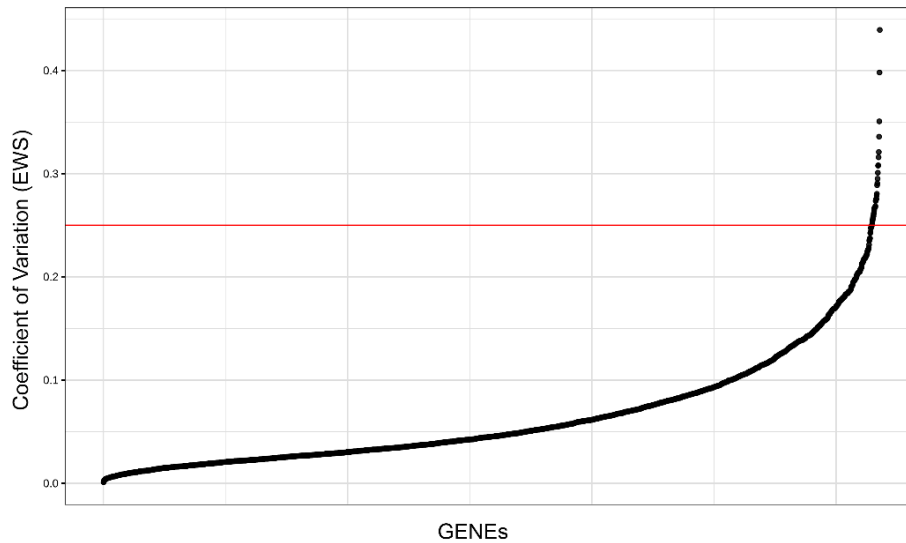

CV<0.1 very good, 0.1-0.2 good, 0.2-0.3 acceptable

294 **Coefficient of Variation** performed on rlog raw count to evaluate the dispersion level of 3,179  
295 expression gene values around the mean in the two group CDS and EWS. The genes showing a  
296  $CV \geq 0.25$  are reported below for the two groups.

297 **CDS:** *DGCR5*, *SIGLEC11*, *BMP7*, *PPP1R1B*, *ABCC8*, *ZNF99*, *NAT8L*, *KIF1A*, *PTGER2*, *COL22A1*,  
298 *AHRR*, *LRRC2*, *GGTA1P*.

299 **EWS:** *KIAA2022, NDNF, ADCY2, GCNT4, ZFPM2, ZIC2, NWD1, HLF, RNF182, LY86, SLC35F1,*  
300 *PPP1R1B, LTK, AR, CCRL2, FLRT1, LRRC10B, KIF4B, MNDA, CADPS, ABCC8, CCL3, FNDC5,*  
301 *BMP7, EPDR1, ETV7, DLX3, FCGR2B, PAX3, TLL7, TCTEX1D1, CABP1, NAT8L*

302 **Supplementary Fig. S7**

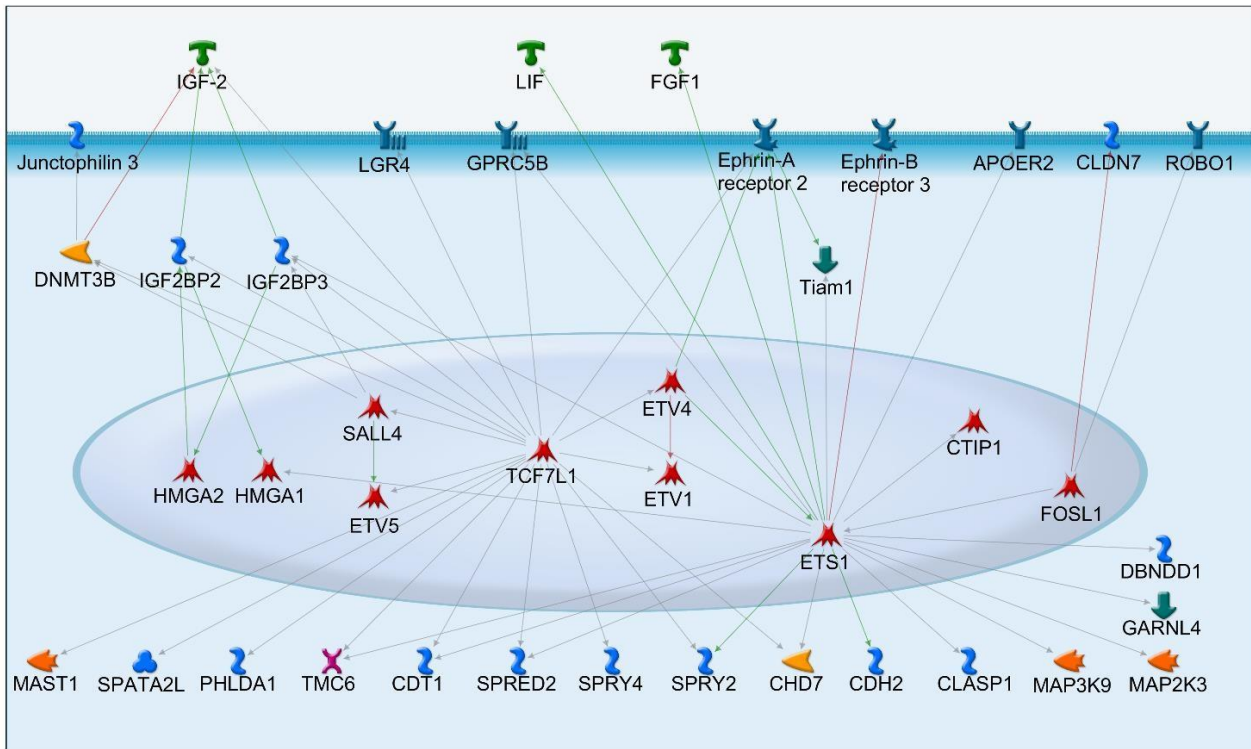

303 **MetaCore analysis**

304 The network was built starting from a subset of 71 DEGs retrieved from leading-edge analysis using  
305 the “direct interaction” algorithm. The resulting network map was graphically refined with GeneGo  
306 Pathway map creator software and genes with no interaction were omitted

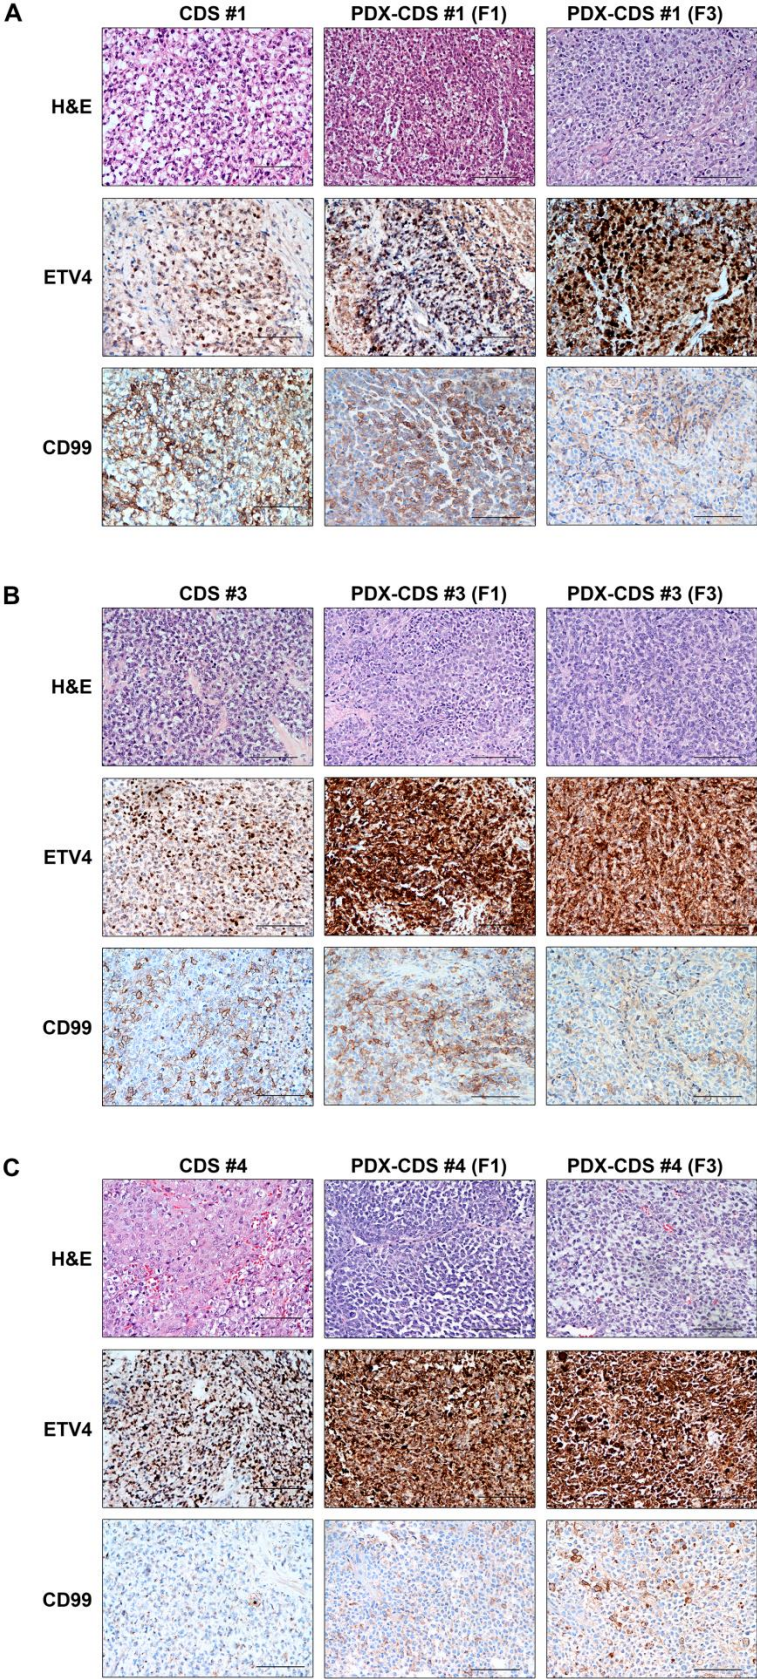

### **Immunostaining of CDS human tumor samples and corresponding PDX**

308 Histologic and immunohistochemical features of patients' CDS#1 (top), CDS#3 (middle), CDS#4  
309 (bottom) and corresponding PDX at different *in vivo* passages. Sections were stained with  
310 hematoxylin and eosin (H&E) or with antibodies against CDS biomarkers CD99 and ETV4. Bar: 100  
311  $\mu\text{m}$ .

312 **Supplementary Fig. S9**

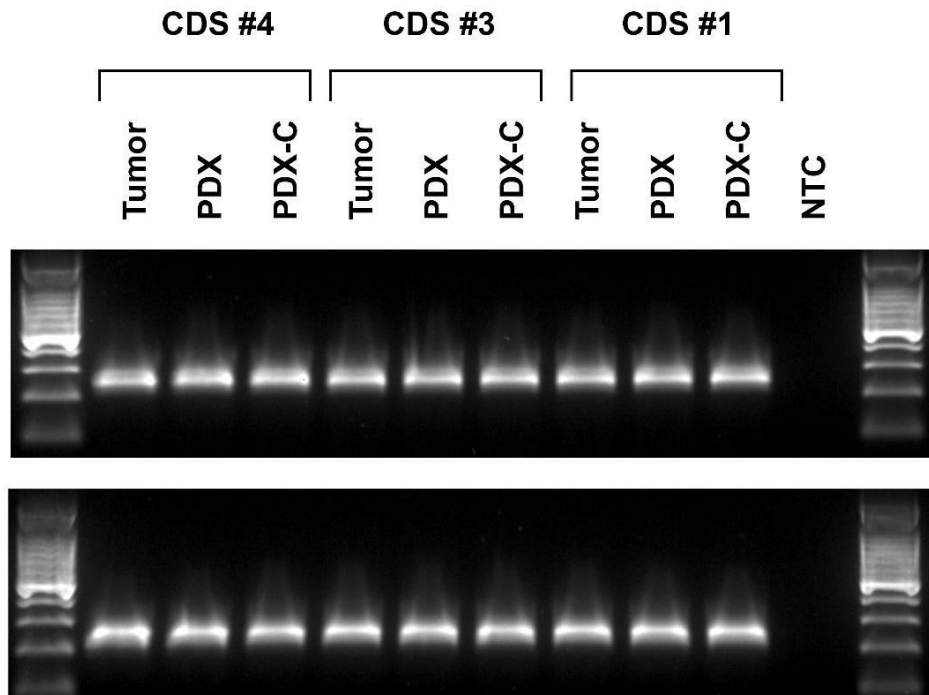

313 **Evidence of CIC-DUX4 fusion transcript in CDS patients, PDXs and PDX-derived cell lines by**  
314 **RT-PCR using two distinct primers as reported in Supplementary Materials and Methods. Agarose**  
315 **gel electrophoresis images of a 233-base fusion transcript are shown. No-template controls (NTC)**  
316 **and 100bp marker are included.**

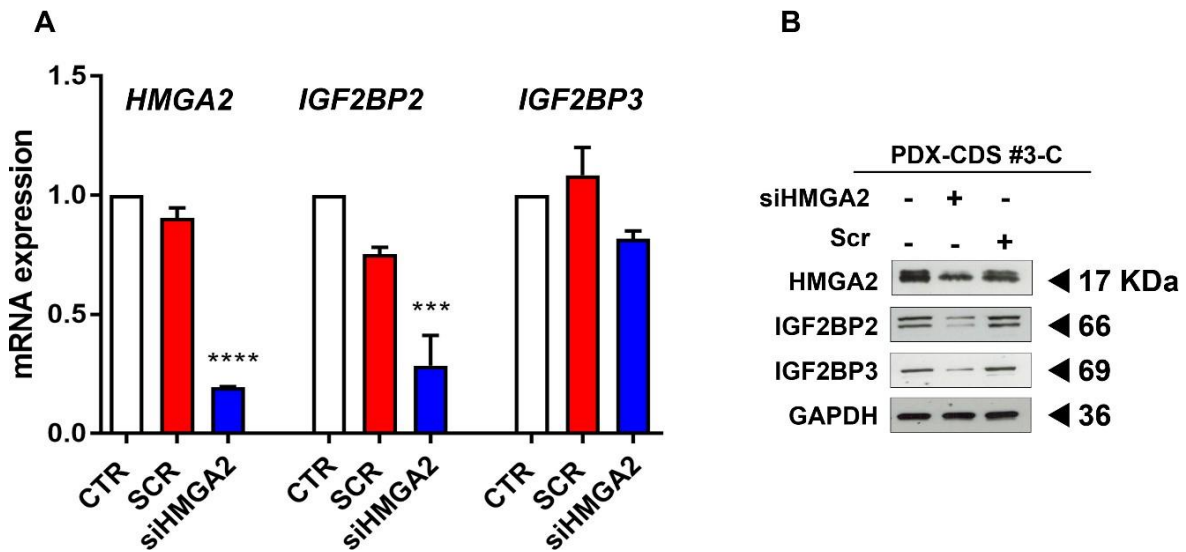

318 **RNA interference silencing of HMGA2 in PDX-CDS#3-C cells.**

319 qRT-PCR (A) and western blot (B) analysis of HMGA2, IGF2BP2, IGF2BP3 analyses were  
 320 performed after 120 hours of transfection with siHMGA2 (40 nmol) or scrambled control siRNA (40  
 321 nmol). Two independent biological replicates were performed. One representative immunoblot is  
 322 shown. GAPDH was used as reference gene. For qRT-PCR, the data represent the mean  $\pm$  SE. \*\*\* p  
 350 < 0.001; \*\*\*\* p < 0.0001, one-way ANOVA.



351 **Supplementary Fig. S11**

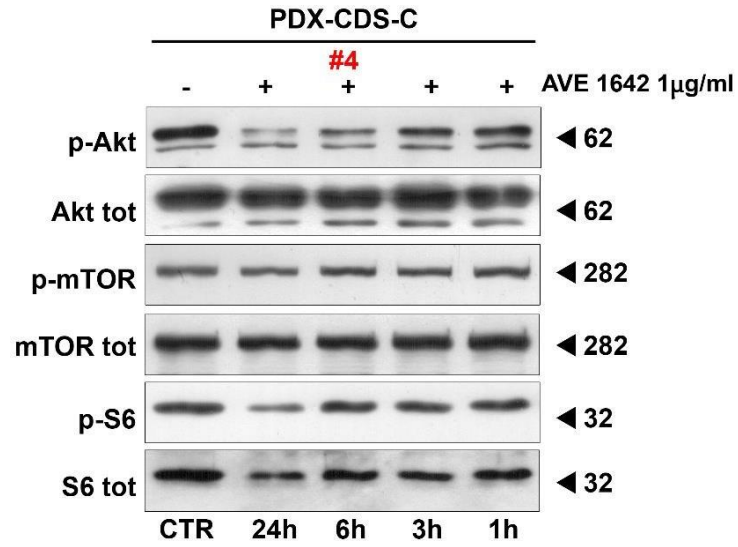

352

353

354 **Akt signaling mediators in the PDX-CDS#4-C cells treated or not with the anti-IGF1R hAb**  
355 **AVE 1642**

356 Western blotting of CDS cells treated or not with AVE 1642. Two independent experiments were  
357 performed. One representative immunoblot is shown.

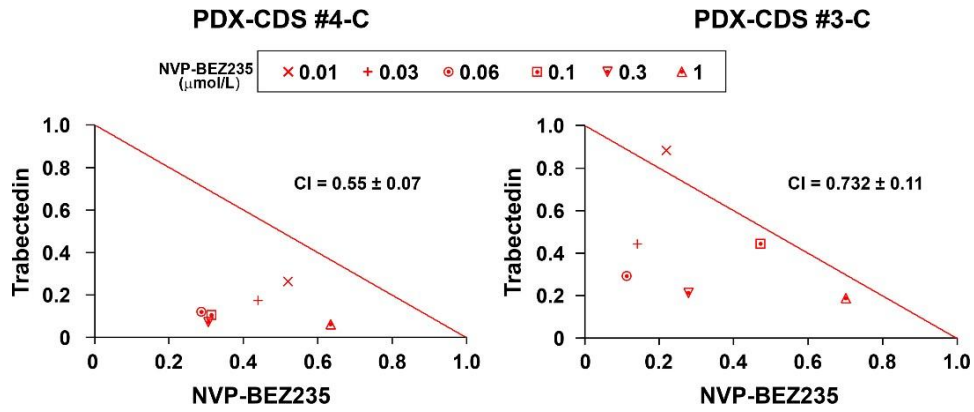

359 **Isobologram:** schematic representation of the effects of combined NVP-BEZ235 and trabectedin  
 360 treatment in PDX-CDS#4-C and PDX-CDS#3-C cell lines. The CI values are represented as the mean  
 361 ± SE and indicate strong synergy between the two drugs. NVP-BEZ235 concentrations are reported  
 362 in the legend (μmol/L).

363 **Supplementary Fig. S13**

364

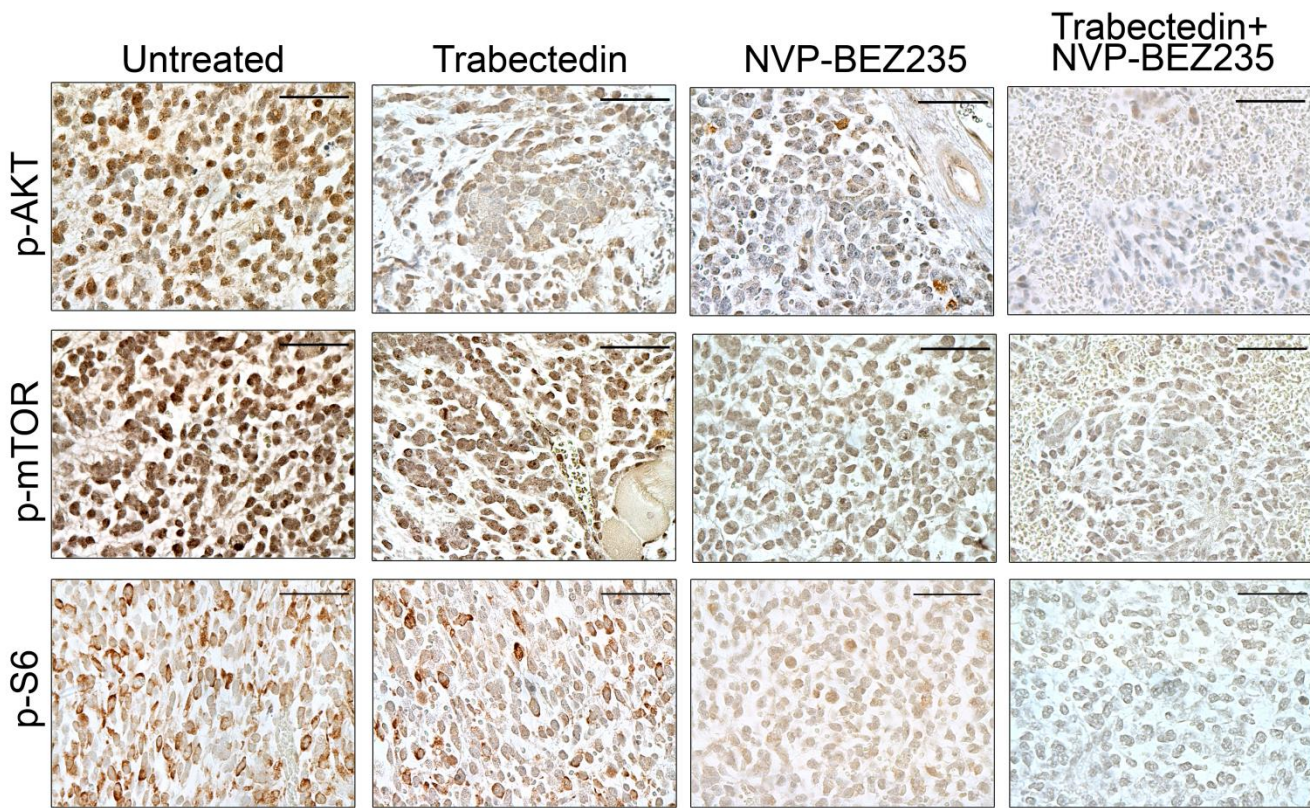

365 **Immunohistochemical evaluation of p-Akt, p-mTOR, and p-S6 in -xenografts after s.c. injection**  
366 **of PDX-CDS#4-C cells treated with trabectedin, NVP-BEZ235 or the combination of the two**  
367 **drugs. Representative figures are shown. Bar: 100  $\mu$ m.**

371 **Supplementary References**

372

- 373 1. Dobin A, Davis CA, Schlesinger F, Drenkow J, Zaleski C, Jha S, *et al.* STAR: ultrafast universal  
374 RNA-seq aligner. *Bioinformatics* **2013**;29:15-21
- 375 2. Anders S, Pyl PT, Huber W. HTSeq--a Python framework to work with high-throughput  
376 sequencing data. *Bioinformatics* **2015**;31:166-9
- 377 3. Love MI, Huber W, Anders S. Moderated estimation of fold change and dispersion for RNA-  
378 seq data with DESeq2. *Genome Biol* **2014**;15:550
- 379 4. Venables WN RB. *Statistics Complements to Modern Applied Statistics with S-Plus* 1997.
- 380 5. Mendez M. CS, Tyrrell P.N. Using Cluster Analysis to Assess the Impact of Dataset  
381 Heterogeneity on Deep Convolutional Network Accuracy: A First Glance. 2020. 13 p.
- 382 6. Zou GY. Toward using confidence intervals to compare correlations. *Psychol Methods*  
383 **2007**;12:399-413
- 384 7. Bonett DG, and Thomas A. Wright. *Sample Size Requirements for Estimating Pearson,*  
385 *Kendall and Spearman Correlations.* 2000.
- 386 8. Snedecor GWaC, W.G. *Statistical Methods.* Iowa State University Press, Ames; 1980.
- 387 9. Gu Z, Eils R, Schlesner M. Complex heatmaps reveal patterns and correlations in  
388 multidimensional genomic data. *Bioinformatics* **2016**;32:2847-9
- 389 10. Subramanian A, Tamayo P, Mootha VK, Mukherjee S, Ebert BL, Gillette MA, *et al.* Gene set  
390 enrichment analysis: a knowledge-based approach for interpreting genome-wide expression  
391 profiles. *Proc Natl Acad Sci U S A* **2005**;102:15545-50
- 392 11. Wei T. SV. R package "corrplot": Visualization of a Correlation Matrix. *Statistician* 2017. 56  
393 p.
- 394 12. Fleming DS, Miller LC. Leading edge analysis of transcriptomic changes during pseudorabies  
395 virus infection. *Genom Data* **2016**;10:104-6
- 396 13. Nanni P, Landuzzi L, Manara MC, Righi A, Nicoletti G, Cristalli C, *et al.* Bone sarcoma patient-  
397 derived xenografts are faithful and stable preclinical models for molecular and therapeutic  
398 investigations. *Sci Rep* **2019**;9:12174
- 399 14. Garofalo C, Manara MC, Nicoletti G, Marino MT, Lollini PL, Astolfi A, *et al.* Efficacy of and  
400 resistance to anti-IGF-1R therapies in Ewing's sarcoma is dependent on insulin receptor  
401 signaling. *Oncogene* **2011**;30:2730-40
- 402 15. Riggi N, Suva ML, Suva D, Cironi L, Provero P, Tercier S, *et al.* EWS-FLI-1 expression triggers a  
403 Ewing's sarcoma initiation program in primary human mesenchymal stem cells. *Cancer Res*  
404 **2008**;68:2176-85

405

406
